# Supplementary material for: The Calcium Sensor Calcineurin B-Like Proteins -Calcineurin B-Like Interacting Protein Kinases Is Involved in Leaf Development and Stress Responses Related to Latex Flow in Hevea brasiliensis
Source: Front Plant Sci. 2022 Feb 25;13:743506. doi: 10.3389/fpls.2022.743506 (PMC8914471; doi:10.3389/fpls.2022.743506)
Supplement: Supplementary file 1 [file Table_1.xls]

## Sheet: Sheet1
Table S1	Primers used in this study
Gene	Forward primer sequence (5'-3')	Reverse primer sequence (5'-3')	Purpose
HbCBL1	GAAGTGGGAAATGGTTAACAGGTAT	CTCTCTTGCCCTTTACATCTGTTAG	RT-PCR
	TCATTACTTCCCTACTGCGGTG	TGAACACAGTCTCCCTGGCAA	Real-time PCR
	NdeI-F: CCATATGATGTTGCAGTGCATAGAGGGAT	SaII-R: GCGTCGACTTACATGTCATCAACTTGTGAGT	Yeast two hybrid system
	EcoRI-F: CGGAATTCATGTTGCAGTGCATAGAGGGATTCAT	Sall-R: GCGTCGACTTACATGTCATCAACTTGTGAGTGG	Yeast complementation test
	XhoI-F: CCGCTCGAGATGTTGCAGTGCATAGAGGGAT	SmaI-R: TCCCCCGGGCATGTCATCAACTTGTGAGTGGAAC	BiFC (pEG100-cYFP)
HbCBL3	AAAAAAAAGAAGGAAAGCAGCTGGG	ATGACATAACTCTGGATCACTTGTTGAG	RT-PCR
	CATATTTGAAGGACCTTACAACTGA	TTAAATGTTTTGCTTTTTCTAACTAAA	Real-time PCR
	NdeI-F: CCATATGATGGGATGCCTTTGCACAAAGCT	SaII-R: GCGTCGACTCACTTGTTGAGATCATCTTCTAT	Yeast two hybrid system
	BamHI-F: CGGGATCCATGGGATGCCTTTGCACAAAGCTGC	SaII-R: GCGTCGACTCACTTGTTGAGATCATCTTCTAT	Yeast complementation test
HbCBL8	CCTTGACTATTGGAGAGCGAAT	GAAGCGGTAACGGATTCTCTTA	Real-time PCR
	NdeI-F: GGAATTCCATATGATGAATTTCTCCAGCAATTCTTCTAGATC	BamHI-R: CGGGATCCCTAACTAGTCAATAGTGTACTCACTTCTTCTCG	Yeast two hybrid system
	BamHI-F: CGGGATCCATGAATTTCTCCAGCAATTCTTCTAGATC	EcoRI-R: GGAATTCCTAACTAGTCAATAGTGTACTCACTTC	Yeast complementation test
HbCBL10	GTAGTTTGAAGGCTAGGCACCAAGT	ACAACGGATCTTTCCAACTCAAGTA	RT-PCR
	CTGGACATGAGGACCCTGTAGT	TTTCTGTTCTTGAAAAGAGCCA	Real-time PCR
	NdeI-F: CCATATGATGGGCTGCATTAGTTCTAAAGT	SaII-R: GCGTCGACTCAGGTAGCAATTTCATCCACCT	Yeast two hybrid system
	BamHI-F: CGGGATCCATGGGCTGCATTAGTTCTAAAGTAG	EcoRI-R: CGGAATTCTCAGGTAGCAATTTCATCCACCTCAG	Yeast complementation test
HbCIPK11	NdeI-F: GGAATTCCATATGATGAGCGTCAAGGTAACTTCAACGCGGACG	BamHI-R: CGGGATCCTTATGATCTCAATCCTTCAATGGTTCCTTCAGATTT	Yeast two hybrid system
	BamHI-F: CGGGATCCATGAGCGTCAAGGTAACTTCAACGCGGAC	EcoRI-R: GGAATTCTTATGATCTCAATCCTTCAATGGTTCCTTC	Yeast complementation test
HbCIPK14	TTTCAAATAGTTCTTTCTTCTGCTG	TAAATACCACAAACAGACGTACACG	RT-PCR
	AAGAAATCTCCGAACTGGGC	ACAAAATAAATCTTGGTCTTGGAG	Real-time PCR
	EcoRI-F: GGAATTCATGCCGCCGGAGATCGAACAAGTC	BamHI-R: CGGATCCTCAGTTACCGACGACCTGACTTTCCG	Yeast two hybrid system
	BamHI-F: CGGGATCCATGCCGCCGGAGATCGAACAAGTCG	EcoRI-R: CGGAATTCTCAGTTACCGACGACCTGACTTTCCG	Yeast complementation test
HbCIPK15	GCTGCTTCTACTGTGCGTAACTCTT	GGACACACAACCATAAGTCATCATT	RT-PCR
	GGTCATGGCAACCAAAAGTAAG	TGATAAACACCCCTGCTGTGG	Real-time PCR
	EcoRI-F: GGAATTCATGGAAAATAAACCCAGTATCTTG	BamHI-R: CGGATCCCTATGTCATTGCTGCAGCTGCTGCT	Yeast two hybrid system
	BamHI-F: CGGGATCCATGGAAAATAAACCCAGTATCTTG	EcoRI-R: CGGAATTCCTATGTCATTGCTGCAGCTGCTGCT	Yeast complementation test
	BamHI-F: CGCGGATCCATGGAAAATAAACCCAGTATCT	SmaI-R: TCCCCCGGGTGTCATTGCTGCAGCTGCTGCTAAT	BiFC (pEG100-nYFP)
HbCIPK16	AATCATCCATCTCAACATCACTG	GCCCTTGGATGCTATTCTGTC	Real-time PCR
	EcoRI-F: CGGAATTCATGCGACTTGGTAAATACGAGCTCGGCAGGACT	Xhol-R: CCGCTCGAGTCACACTTGTGTGGTCAACAGTCCTTGACCCGAT	Yeast two hybrid system
	EcoRI-F: GGAATTCATGCGACTTGGTAAATACGAGCTCGGCAGG	Sall-R: ACGCGTCGACTCACACTTGTGTGGTCAACAGTCCTTGACC	Yeast complementation test
HbCIPK18	AATTGATGCAGAAAATCGTTCTATT	AAAAGCTTATCTCCACATGATAAGA	RT-PCR
	GGAGAATGTGAAAATCAAACCTCAT	CCAAATCCATGATTTAACTTGCTAA	Real-time PCR
	NdeI-F: CCATATGATGGAAGAGAGGCATGTGCTGTTTG	BamHI-R: CGGGATCCCTATAATGAGGTTTGATTTTCAC	Yeast two hybrid system
	BamHI-F: CGGGATCCATGGAAGAGAGGCATGTGCTGTTTG	SaII-R: GCGTCGACCTATAATGAGGTTTGATTTTCACAT	Yeast complementation test
	BamHI-F: CGGGATCCATGGAAGAGAGGCATGTGCTGTT	SmaI-R: TCCCCCGGGTAATGAGGTTTGATTTTCACATT	BiFC (pEG100-nYFP)
HbCIPK23	TGACAACGAGACCAGCAAGTAG	CACCTCCACCACTAAAAACGAC	Real-time PCR
HbCIPK26	TATCAGTCATATTGCCTTAGCAAGT	GAAGCATCCACCCATTTATACTGAT	RT-PCR
	GATGGAGCAGATTAAGCGAGAA	GAAAAGCTCACCGCCTTTAATAT	Real-time PCR
	EcoRI-F: CGGAATTCATGGAAAACAAAGGGCATGTGTTG	Xhol-R: CCTCGAGTTAGGTTGCATTATGAGATGAAGC	Yeast two hybrid system
	EcoRI-F: CGGAATTCATGGAAAACAAAGGGCATGTGTTGAT	Sall-R: GCGTCGACTTAGGTTGCATTATGAGATGAAGC	Yeast complementation test
HbCIPK27	GAATCCTACACACGCACAAAAACAT	TCAACCACTAAACGAACCCCACATA	RT-PCR
	AATGATCGGTCAGATTAAACGC	AAGTTCACCGCCAGTAACAAAT	Real-time PCR
	NdeI-F: CCATATGATGACATCTCGAGGGAGTGCTGCGAC	SmaI-R: CCCCGGGTTATATATCTGTTGGCATGTTAAGAC	Yeast two hybrid system
	SpeI-F: GGACTAGTATGACATCTCGAGGGAGTGCTGCGAC	SaII-R: GCGTCGACTTATATATCTGTTGGCATGTTAAGACG	Yeast complementation test
	SmaI-F: TCCCCCGGGATGACATCTCGAGGGAGTGCTGCG	XbaI-R: GCTCTAGATGTCAGTGACGGTACCACAGCAGCAC	BiFC (pEG100-nYFP)
HbCIPK30	ATGAAAAAGGTGACAAGGAAG	TCAGAGAAGTAGACTGGGATTC	RT-PCR
	AGGCTTCTGGTGATACTCTTGAATA	ATCATAATATACAAATGGCAAAACAT	Real-time PCR
	NdeI-F: GGAATTCCATATGATGAAAAAGGTGACAAGGAAGGTGGGTAAG	BamHI-R: CGGGATCCTCAGAGAAGTAGACTGGGATTCACGCCATCTGTT	Yeast two hybrid system
	BamHI-F: CGGGATCCATGAAAAAGGTGACAAGGAAGGTGGGTAAG	EcoRI-R: GGAATTCTCAGAGAAGTAGACTGGGATTCACGCCATC	Yeast complementation test
	BamHI-F: CGGGATCCATGAAAAAGGTGACAAGGAAGGTG	SmaI-R: TCCCCCGGGGAGAAGTAGACTGGGATTCACGCC	BiFC (pEG100-nYFP)
HbSOS1	Smal-F: CCCCGGGATGGCGACTGTGATCGAGGGTCAGTTTCCGTACAGAATTTTGGCTC	SaII-R: GCGTCGACTTAGGTAGCCAGGCGGAAAGAAAGCCTACTTGGTGAGTCGATT	Yeast complementation test
	BgIII-F: GAAGATCTATGGCGACTGTGATCGAGGGTCAGTTTCCGTACAGAATTTTGGC	KpnI-R: GGGGTACCTTAGGTAGCCAGGCGGAAAGAAAGCCTACTTGGTGAGTCGATT	Yeast complementation test
