# Supplementary material for: The Calcium Sensor Calcineurin B-Like Proteins -Calcineurin B-Like Interacting Protein Kinases Is Involved in Leaf Development and Stress Responses Related to Latex Flow in Hevea brasiliensis
Source: Front Plant Sci. 2022 Feb 25;13:743506. doi: 10.3389/fpls.2022.743506 (PMC8914471; doi:10.3389/fpls.2022.743506)
Supplement: Supplementary file 3 [file Table_3.xls]

## Sheet: Sheet1
Table S3. Basic information for Illumina sequencing data of Hevea brasiliensis
Experiments			Sample Name				SRA ID					Raw Reads No.					Clean Reads No.						Mean Size (bp)
Tissues			Latex				SRR3136162_1					20871900					16042038 (76.9%)						100.2
			Latex				SRR3136162_2					20871900					14148279 (67.8%)						98.9
			Bark				SRR3136158_1					36914453					26795799 (72.6%)						99.1
			Bark				SRR3136158_2					36914453					18411926 (49.9%)						99.7
			Leaf				SRR3136159_1					38065117					29555463 (77.6%)						99.3
			Leaf				SRR3136159_2					38065117					20614337 (54.2%)						99.8
			Root				SRR3136156_1					32752722					26570899 (81.1%)						98.8
			Root				SRR3136156_2					32752722					26025729 (79.5%)						98.8
			Seed				SRR3136168_1					36663301					26612636 (72.6%)						100.8
			Seed				SRR3136168_2					36663301					24699302 (67.4%)						100.6
			Female flower				SRR3136165_1					38209941					31476502 (82.4%)						100.9
			Female flower				SRR3136165_2					38209941					29554507 (77.3%)						100.7
			Male flower				SRR3136166_1					37552053					28026445 (74.6%)						100.9
			Male flower				SRR3136166_2					37552053					26371706 (70.2%)						100.7
Ethephon treatment			Latex/0h				SRR3136173_1					28667449					19490484 (68.0%)						98.9
			Latex/0h				SRR3136173_2					28667449					19057468 (66.5%)						98.9
			Latex/3h				SRR3136176_1					31763836					16722400 (52.6%)						100.4
			Latex/3h				SRR3136176_2					31763836					15429064 (48.6%)						100.3
			Latex/12h				SRR3136177_1					28533332					15653064 (54.9%)						100.4
			Latex/12h				SRR3136177_2					28533332					14213061 (49.8%)						100.3
			Latex/24h				SRR3136178_1					31261306					16968235 (54.3%)						100.4
			Latex/24h				SRR3136178_2					31261306					15538155 (49.7%)						100.2
Leaf development			Leaf/Bronze				SRR3136185_1					24197695					19732642 (81.5%)						99.2
			Leaf/Bronze				SRR3136185_2					24197695					14157029 (58.5%)						99.8
			Leaf/Color-change				SRR3136188_1					36132975					28671497 (79.3%)						99.2
			Leaf/Color-change				SRR3136188_2					36132975					20021135 (55.4%)						99.7
			Leaf/Pale-green				SRR3136190_1					28775048					22013017 (76.5%)						99.2
			Leaf/Pale-green				SRR3136190_2					28775048					15235698 (52.9%)						99.7
			Leaf/Mature				SRR3136192_1					34137140					25330596 (74.2%)						99.2
			Leaf/Mature				SRR3136192_2					34137140					17348565 (50.8%)						99.8
