# Supplementary material for: The Calcium Sensor Calcineurin B-Like Proteins -Calcineurin B-Like Interacting Protein Kinases Is Involved in Leaf Development and Stress Responses Related to Latex Flow in Hevea brasiliensis
Source: Front Plant Sci. 2022 Feb 25;13:743506. doi: 10.3389/fpls.2022.743506 (PMC8914471; doi:10.3389/fpls.2022.743506)
Supplement: Supplementary file 4 [file Table_4.xlsx]

## Sheet: Sheet1
	Sample\Gene	HbCIPK26	HbCIPK15	HbCIPK14	HbCIPK16	HbCBL1
1	SRR3136185-Leaf_Bronze	30.29	21.37	42.56	12.16	38.52
2	SRR3136188-Leaf_Color change	47.26	25.2	97.46	29.18	28.83
3	SRR3136190-Leaf_Pale green	61.72	29.28	123.73	53.98	29.73
4	SRR3136192-Leaf_Mature	361.17	33.49	118.8	145.46	22.48
5	SRR3136162-Latex	1260.22	69.01	114.64	9.82	72.6
6	SRR3136159-Leaf	245.4	22.48	228.33	61.56	29.12
7	SRR3136158-Bark	116.77	23.91	121.99	12.07	46.98
8	SRR3136156-Root	87.57	45.43	194.79	31.2	63.83
9	SRR3136168-Seed	38.07	53.69	142.35	3.83	61.08
10	SRR3136165-Female flower	74.06	46.6	147.83	41.28	35.42
11	SRR3136166-Male flower	143.46	39.1	127.88	58.75	41.62
12	SRR3136173-Latex_Ethylene 0h	1126.31	54.66	37.45	14.74	90.26
13	SRR3136176-Latex_Ethylene 3h	1036.99	90.2	39	24.55	130.28
14	SRR3136177-Latex_Ethylene 12h	950.01	69.5	98.99	62.26	116.98
15	SRR3136178-Latex_Ethylene 24h	1106.47	131.4	107.04	63.48	153.14
16	SRR1508164-Latex_RRIM600	192.72	112.48	2.87	1.66	17.88
17	SRR1508165-Latex_RRIM600	192.39	115.16	2.37	2.26	19.47
18	SRR1508166-Latex_RY7-20-59	262.6	44.07	5.37	3.63	27.04
19	SRR1508167-Latex_RY7-20-59	267.32	43.09	5.75	3.36	28.08
20	SRR1533844-Latex_PR107	213.29	37.73	2.81	14.06	43.36
21	SRR1533845-Latex_RY8-79	283.13	28.64	2.45	16.48	38.09
22	SRR1588170-Bark_Healthy	62.24	46.11	222.91	11.78	55.3
23	SRR1611790-Bark_Healthy	48.66	35.52	347.03	23.53	53.4
24	SRR1611791-Bark_Brown bast	68.81	45.62	153.66	4.7	49.08
25	SRR1611792-Bark_Tapping panel dryness	69.78	58.01	163.91	6.75	64.02
26	SRR2001614-Latex_PR107	213.29	37.73	2.81	14.06	43.36
27	SRR2001618-Latex_RRIM600	192.55	113.8	2.62	1.96	18.67
28	SRR2001619-Latex_RY7-20-59	264.93	43.58	5.56	3.5	27.55
29	SRR2001620-Latex_RY8-79	283.13	28.64	2.45	16.48	38.09
30	SRR2001623-Latex_RY7-33-97 Control-1	269.78	51	3.35	19.5	34.9
31	SRR2002800-Latex_RY7-33-97 Control-2	245.43	46.32	2.5	14.13	41.76
32	SRR2002801-Latex_RY7-33-97 JA-1	258.43	52.8	5.68	18.22	23.33
33	SRR2002802-Latex_RY7-33-97 ET-1	289.34	76.24	19.6	19.09	52.56
34	SRR2002803-Latex_RY7-33-97 JA-2	269.15	44.99	2.48	12.94	31.97
35	SRR2002804-Latex_RY7-33-97 ET-2	243.71	55.73	19.31	14.82	48.76
36	SRR2155561-Leaf_R366N2-48h	29.13	33.06	7.83	1.57	27.9
37	SRR2156988-Leaf_R366N1-0h	41.33	49.04	47.81	3.37	35.79
38	SRR2156992-Leaf_R366N1-48h	28.63	27.45	8.61	2.38	26.52
39	SRR2157179-Leaf_R366N2-0h	28.53	25.29	26.52	2.25	37.77
40	SRR5051416-Bark_2 mg MeJA for 24 h	115.38	23.02	310.03	6.82	59.89
41	SRR5051417-Bark_0 mg MeJA for 24 h	104.2	17.56	178.79	10.76	52.73
42	SRR5051418-Bark_4 mg MeJA for 24 h	106.66	17.6	217.45	11.58	58.36
43	SRR611640-Leaf_RRII105-C1	29.41	40.18	28.51	5	42.73
44	SRR611643-Leaf_GT1-C2	33.53	36.1	41.2	7.31	37.05
45	SRR611644-Leaf_RRII105-T1	33.75	30.94	64.37	5.45	48.54
46	SRR611645-Leaf_GT1-T2	46.02	29.25	110.22	10.17	38
47	SRR620233-Leaf_RRIM600 Control	220.48	72.29	31.61	43.87	60.06
48	SRR620234-Leaf_RRIM600 Drought	114.52	72.31	34.17	19.47	50.81
49	SRR620235-Leaf_RRIM600 Low Temp	223.91	56.74	323.1	170.76	51.13
50	SRR620236-Latex_RRII105 ET	426.61	58.59	65.73	25.76	151.09
51	SRR620237-Latex_RRII105 Control	280.57	41.24	30.89	11.84	69.33
52	SRR854520-RRIM928 Bark	128.41	44.7	160.39	15.87	51.04
53	SRR854521-RRIM928 Latex	719.5	111.86	47.46	21.71	161.22
54	SRR854522-RRIM928 Leaf	109.21	108.29	27.67	32.62	38.8
55	107-1d	105.34	25.03	12.48	19.93	26.85
56	107-3d	190.54	38.82	10.31	12.45	37.4
57	107-5d	221.66	40.23	15.26	12.44	28.29
58	107-7d	248.41	42.18	21.79	11.2	29.42
59	107-9d	233.14	38.86	22.45	12.29	35.43
60	72059-1d	113.91	27.09	2.08	10.39	15.98
61	72059-3d	208.82	40.46	2.25	8.85	28.87
62	72059-5d	235.81	39.38	5.74	4.89	26.19
63	72059-7d	219.84	36.18	7.3	5.34	27.73
64	72059-9d	215.88	41.96	5.64	4.72	30.59
65	879-1d	150.51	18.27	3.81	12.14	28.3
66	879-3d	152.14	17.46	7.46	15.12	22.77
67	879-5d	227.89	29.35	8.19	12.95	25.17
68	879-7d	189.57	27.53	7.58	14.76	28.45
69	879-9d	199.05	25.42	7.46	12.58	31.03
70	SRR1951827	120.33	71.7	84.06	20.66	22.1
71	SRR1951830	144.33	122.49	166.19	29.45	29.84
72	SRR1951828	117.67	77.97	84.4	22.28	24.44
73	SRR1951831	85.27	61.03	126.54	11.85	17.81
74	SRR1951829	91.34	50.09	82.49	19.54	17.86
75	SRR1951832	98.46	61.1	123.98	13.66	17.08
76	SRR6668802_93-114_Control	278.03	86.56	145.76	113.35	33.93
77	SRR6668808_93-114_Control	232.63	113.24	143.98	99.64	34.34
78	SRR6668809_93-114_Control	300.92	118.51	189.44	113.37	37.81
79	SRR6668803_93-114_2h	269.37	105.96	284.74	73.44	38.76
80	SRR6668804_93-114_2h	319.66	129.1	136.98	93.48	31.36
81	SRR6668805_93-114_2h	237.53	112.62	190.68	81.19	32.5
82	SRR6668800_93-114_8h	234.57	103.77	180.95	57.56	17.14
83	SRR6668801_93-114_8h	208.14	70.77	262.16	51.49	19.68
84	SRR6668821_93-114_8h	179.45	65.81	254.13	50.97	23.7
85	SRR6668820_93-114_24h	201.16	73.48	146.6	52.1	15.18
86	SRR6668822_93-114_24h	167.78	68.41	390.86	57.56	21.56
87	SRR6668823_93-114_24h	203.69	70.14	170.88	47.9	12.33
88	SRR6668812_501_Control	245.64	30.56	131.6	108.71	34.75
89	SRR6668813_501_Control	299.77	35.82	204.73	130.49	32.78
90	SRR6668814_501_Control	227.12	37.43	140.17	97.91	27.5
91	SRR6668815_501_2h	420.56	35.91	104.92	66.89	29.64
92	SRR6668816_501_2h	172.62	28.11	135.4	76.95	27.47
93	SRR6668817_501_2h	408.61	41.56	118.2	65.45	29.31
94	SRR6668810_501_8h	237.79	50	156.3	63.82	25.1
95	SRR6668818_501_8h	279.38	39.93	184.67	49.42	19.05
96	SRR6668819_501_8h	261.16	48.73	208.35	36.66	22.63
97	SRR6668806_501_24h	211.03	30.88	194.26	31.51	8.83
98	SRR6668807_501_24h	221.74	17.5	216.8	37.6	11.4
99	SRR6668811_501_24h	193.28	35.16	176.25	30.51	11.17
100	SRR7627556_GT1_0h_rep1	157.92	20.72	103.53	23.52	31.4
101	SRR7627555_GT1_0h_rep2	297.5	53.39	91.2	25.53	28.84
102	SRR7627558_GT1_0h_rep3	155.29	25.76	89.27	14.34	40.68
103	SRR7627562_GT1_90m_rep1	144.02	24.28	117.57	19.36	41.22
104	SRR7627561_GT1_90m_rep2	188.37	28.96	219.49	28.89	25.62
105	SRR7627554_GT1_90m_rep3	120.17	20.2	81.07	19.14	30.43
106	SRR7627544_GT1_12h_rep1	129.33	38.76	114.19	25.14	35.55
107	SRR7627543_GT1_12h_rep2	168.9	42.39	231.78	55.15	25.15
108	SRR7627550_GT1_12h_rep3	116.66	44.63	298.09	50.85	22.52
109	SRR7627552_GT1_24h_rep1	80.66	21.13	134.03	26.33	18.94
110	SRR7627551_GT1_24h_rep2	132.21	48.57	310.43	54.24	10.56
111	SRR7627565_GT1_24h_rep3	55.51	34.75	242.35	42.83	9.3
112	SRR7627557_RRIM600_0h_rep1	204.64	47.52	276.06	23.98	27.33
113	SRR7627560_RRIM600_0h_rep2	342.59	37.54	117.97	21.37	48.5
114	SRR7627559_RRIM600_0h_rep3	219.65	62.95	281.78	24.84	27.43
115	SRR7627553_RRIM600_90m_rep1	179.67	27.35	217.38	19.42	19.43
116	SRR7627546_RRIM600_90m_rep2	215.87	25.54	172.88	27.22	35.28
117	SRR7627545_RRIM600_90m_rep3	183.11	48.7	223.78	21.46	13.02
118	SRR7627549_RRIM600_12h_rep1	112.6	37.09	238.71	19.53	29.12
119	SRR7627548_RRIM600_12h_rep2	118.65	50.4	389.33	34.77	29.8
120	SRR7627547_RRIM600_12h_rep3	105.01	38.83	632.96	58.53	14.83
121	SRR7627566_RRIM600_24h_rep1	75.36	34.45	267.43	22.12	10.69
122	SRR7627563_RRIM600_24h_rep2	34.5	26.97	251.52	20.62	14.15
123	SRR7627564_RRIM600_24h_rep3	49.25	51.24	507	51.29	7.92
