# Supplementary material for: The Calcium Sensor Calcineurin B-Like Proteins -Calcineurin B-Like Interacting Protein Kinases Is Involved in Leaf Development and Stress Responses Related to Latex Flow in Hevea brasiliensis
Source: Frontiers journal article supplement (doi:10.3389/fpls.2022.743506), 2022-02-25
Supplement: Table_2.xls [file Table_2.xls]

## Sheet: Sheet1
Table S2. Characteristics of CIPK and CBL genes in Manihot esculenta, Ricinus communis, Arabidopsis thaliana, Populus trichocarpa and Oryza sativa
a) M. esculenta
Genes	ID	CDS length	Predicted protein			No. of introns	Group
			Length (aa)	isoelectric point	Mol Wt
MeCIPK1	17980389	1293	431	7.15	48470.6	11	A
MeCIPK2	17986911	1377	459	8.3	51936.8	0	C
MeCIPK3	17981935	1086	362	5.85	40944.3	9	A
MeCIPK4	17967815	1317	439	6.88	50258.8	9	A
MeCIPK5	17970417	1389	463	8.79	51886	14	A
MeCIPK6	17969803	1314	438	9.05	49106.6	0	C
MeCIPK7	17986134	1314	438	9.19	49430.2	0	C
MeCIPK8	17968519	1338	446	7.63	50526.1	13	A
MeCIPK9	17975691	1194	398	9.02	44718.6	11	A
MeCIPK10	17972592	1311	437	8.94	49285.7	13	A
MeCIPK11	17991989	1296	432	8.88	48832.3	0	D
MeCIPK12	17975858	1497	499	6.63	56045.4	0	E
MeCIPK13	17960162	1350	450	9.12	50938.9	0	C
MeCIPK14	17964312	1287	429	7.08	48244.6	0	D
MeCIPK15	17980742	1299	433	9.1	49126.9	0	D
MeCIPK16	17964936	1371	457	8.79	51764.7	0	C
MeCIPK17	17983223	1359	453	8.66	50870.3	0	C
MeCIPK18	17964314	1428	476	8.92	53952.4	0	C
MeCIPK19	17983926	1431	477	8.08	53634.7	0	E
MeCIPK20	17983917	1362	454	9.2	51324.8	0	C
MeCIPK21	17976618	1407	469	6.08	52969.6	13	A
MeCIPK22	17980746	1347	449	8.37	51347.4	0	C
MeCIPK23	17972643	1389	463	8.95	51766.6	14	A
MeCIPK24	17972897	1341	447	8.29	50174.9	13	A
MeCIPK25	17959812	1344	448	8.69	50743.7	0	C
MeCBL1	17983127	747	249	4.7	28741.9	8	Ⅰ
MeCBL2	17976025	744	248	4.7	28559.4	8	Ⅰ
MeCBL3	17981216	669	223	4.77	25836.4	7	Ⅱ
MeCBL4	17979582	639	213	4.62	24559.9	7	Ⅲ
MeCBL5	17981879	654	218	5.2	25360.2	7	Ⅳ
MeCBL6	17991272	639	213	4.76	24497.9	7	Ⅲ
MeCBL7	17988397	672	224	4.6	25697.4	8	Ⅳ
MeCBL8	17970750	549	183	4.6	20977.9	6	Ⅳ
MeCBL9	17976577	636	212	4.51	24326.5	7	Ⅳ
b) R. communis
Genes	ID	CDS length	Predicted protein			No. of introns	Group
			Length (aa)	isoelectric point	Mol Wt
RcCIPK1	16799129	1338	446	8.94	50652.8	0	D
RcCIPK2	16799139	1572	524	8.76	59411.3	15	A
RcCIPK3	16799649	1038	346	9.42	39042	11	A
RcCIPK4	16800495	1284	428	8.36	48349.1	0	C
RcCIPK5	16800598	1347	449	8.07	50673.4	13	A
RcCIPK6	16802139	1296	432	9.1	48432	0	C
RcCIPK7	16803225	1362	454	8.49	51087.9	0	C
RcCIPK8	16803390	1338	446	7.63	50605.1	13	A
RcCIPK9	16803468	1404	468	8.87	52471.4	14	A
RcCIPK10	16806991	1371	457	9.25	51764.6	0	C
RcCIPK11	16811202	1323	441	8.63	49552.3	0	C
RcCIPK12	16812346	1308	436	8.4	49163.4	11	A
RcCIPK13	16814527	1287	429	8.43	48682.8	0	D
RcCIPK14	16814534	1371	457	8.58	52278	0	C
RcCIPK15	16815822	1377	459	9.18	52198.9	0	C
RcCIPK16	16815823	1548	516	6.59	57746	0	E
RcCIPK17	16817825	1398	466	7.59	53263.5	13	A
RcCIPK18	16810892	1290	430	8.58	48066.6	0	B
RcCBL1	16809874	429	143	4.49	16537.9	5	Ⅲ
RcCBL2	16815754	654	218	4.89	25466.2	7	Ⅳ
RcCBL3	16810290	672	224	4.66	25731.2	7	Ⅱ
RcCBL4	16808690	747	249	4.74	28760.9	8	Ⅰ
RcCBL5	16799410	669	223	4.7	25735.2	7	Ⅱ
RcCBL6	16823221	729	243	4.82	27787.8	7	Ⅳ
RcCBL7	16823220	630	210	4.49	24252.5	7	Ⅳ
RcCBL8	16807648	636	212	4.67	24125.3	7	Ⅳ
c) A. thaliana
Genes	ID	CDS length	Predicted protein			No. of introns	Group
			Length (aa)	isoelectric point	Mol Wt
AtCIPK1	At3g17510.1	1332	444	6.41	49933.2	11	A
AtCIPK2	At5g07070.1	1368	456	8.5	51868.9	0	C
AtCIPK3	At2g26980.4	1353	451	7.64	51823.5	14	A
AtCIPK4	At4g14580.1	1278	426	8.22	47826.1	0	B
AtCIPK5	At5g10930.1	1335	445	6.05	50874.6	0	C
AtCIPK6	At4g30960.1	1323	441	9	49356.8	0	C
AtCIPK7	At3g23000.1	1287	429	8.99	48265.8	0	B
AtCIPK8	At4g24400.1	1335	445	8.48	50428.2	13	A
AtCIPK9	At1g01140.3	1353	451	8.26	50909.2	13	A
AtCIPK10	At5g58380.1	1437	479	6.75	54589.4	0	C
AtCIPK11	At2g30360.1	1305	435	8.44	49017.4	0	D
AtCIPK12	At4g18700.1	1467	489	7.09	55017.2	0	E
AtCIPK13	At2g34180.1	1506	502	8.38	56730.6	0	E
AtCIPK14	At5g01820.1	1326	442	8.14	50297.8	0	D
AtCIPK15	At5g01810.1	1263	421	8.88	47928.5	0	C
AtCIPK16	At2g25090.1	1407	469	5.74	53551.4	1	C
AtCIPK17	At1g48260.1	1296	432	6.62	48663.1	10	A
AtCIPK18	At1g29230.1	1560	520	7.58	58542.6	0	E
AtCIPK19	At5g45810.1	1449	483	8.97	54616	0	E
AtCIPK20	At5g45820.1	1317	439	9.04	50167.8	0	C
AtCIPK21	At5g57630.1	1248	416	8.72	46343.6	9	A
AtCIPK22	At2g38490.1	1365	455	9.17	51554.9	0	D
AtCIPK23	At1g30270.1	1446	482	9.25	53514.3	14	A
AtCIPK24	At5g35410.1	1338	446	8.9	50634.5	12	A
AtCIPK25	At5g25110.1	1464	488	8.64	55563	0	C
AtCIPK26	At5g21326.1	1317	439	8.48	49629	13	A
AtCBL1	At4g17615.1	639	213	4.74	24554	7	Ⅲ
AtCBL2	At5g55990.1	678	226	4.89	25809.4	7	Ⅱ
AtCBL3	At4g26570.2	690	230	4.8	26538.1	6	Ⅱ
AtCBL4	At5g24270.1	666	222	5.13	25693.5	7	Ⅳ
AtCBL5	At4g01420.1	609	203	4.84	23518	7	Ⅳ
AtCBL6	At4g16350.1	678	226	5.56	26028.9	6	Ⅱ
AtCBL7	At4g26560.1	642	214	4.78	24404.4	6	Ⅱ
AtCBL8	At1g64480.1	642	214	5.01	24649.3	7	Ⅳ
AtCBL9	At5g47100.1	639	213	4.58	24531.8	7	Ⅲ
AtCBL10	At4g33000.1	768	256	4.72	29342.5	8	Ⅰ
d) P. trichocarpa
Genes	ID	CDS length	Predicted protein			No. of introns	Group
			Length (aa)	isoelectric point	Mol Wt
PtCIPK1	26978785	1422	474	8.34	53313.2	12	A
PtCIPK2	27025535	1368	456	9.03	51969	0	C
PtCIPK3	27045493	1365	455	8.97	52081.2	13	A
PtCIPK4	26988441	1323	441	6.66	50388.9	13	A
PtCIPK5	27038245	1296	432	8.8	48130.7	0	B
PtCIPK6	27005554	1353	451	8.26	51276.1	0	C
PtCIPK7	27011339	1269	423	9.06	47569.9	1	C
PtCIPK8	27010927	1185	395	9.01	44623.6	0	C
PtCIPK9	27006384	972	324	7.57	36199.3	1	C
PtCIPK10	26978528	1305	435	8.99	48338.1	0	B
PtCIPK11	27002249	1353	451	9.14	51193	0	C
PtCIPK12	27020767	1326	442	9.24	49840.6	14	A
PtCIPK13	27032875	1326	442	8.81	49760.3	14	A
PtCIPK14	26995230	1314	438	8.68	49470.8	1	C
PtCIPK15	27025583	1281	427	8.44	48579	0	D
PtCIPK16	26995789	1254	418	8.73	47397.7	1	D
PtCIPK17	27002557	1371	457	9.22	51711.9	1	E
PtCIPK18	26992323	1578	526	8	58822.7	0	E
PtCIPK19	27011408	1353	451	6.5	51192.1	0	C
PtCIPK20	27013905	1290	430	8.52	49019.7	0	D
PtCIPK21	27012360	1410	470	8.86	53222.6	0	C
PtCIPK22	26998502	1380	460	7.98	51868.6	0	C
PtCIPK23	27007711	1392	464	8.9	52169.9	14	A
PtCIPK24	27010587	1419	473	9.08	52554.4	14	A
PtCIPK25	27009740	1476	492	9.02	56178.7	14	A
PtCIPK26	27003693	1308	436	7.67	49388	13	A
PtCBL2	27001543	666	222	4.77	25769.3	7	Ⅱ
PtCBL3	27008119	678	226	4.74	25887.3	7	Ⅱ
PtCBL4	27049041	639	213	4.78	24498.9	7	Ⅳ
PtCBL5	27040245	669	223	4.8	25672.3	7	Ⅱ
PtCBL6	26998100	732	244	4.93	27826.1	7	Ⅰ
PtCBL7	27018137	684	228	4.96	26014.8	7	Ⅳ
PtCBL8	27018789	639	213	4.69	24009.4	7	Ⅳ
PtCBL9	27043549	639	213	4.65	24340.7	7	Ⅲ
PtCBL10	27004813	789	263	4.85	30234.6	8	Ⅰ
e) O. sativa
Genes	ID	CDS length	Predicted protein			No. of introns	Group
			Length (aa)	isoelectric point	Mol Wt
OsCIPK1	LOC_Os01g18800.1	1383	461	6.26	52201.6	12	A
OsCIPK2	LOC_Os07g48100.1	1329	443	9.18	50272.4	0	C
OsCIPK3	LOC_Os03g20380.1	1347	449	7.98	50954.5	13	A
OsCIPK4	LOC_Os12g41090.1	1317	439	12.06	47208.6	0	B
OsCIPK5	LOC_Os01g10890.1	1383	461	9.28	51965.8	0	C
OsCIPK6	LOC_Os08g34240.1	1353	451	8.95	48910.1	0	C
OsCIPK7	LOC_Os03g43440.1	1341	447	9.35	48373.9	0	B
OsCIPK8	LOC_Os01g35184.2	1338	446	6.45	50597.8	13	A
OsCIPK9	LOC_Os03g03510.1	1368	456	7.17	51033.5	13	A
OsCIPK10	LOC_Os03g22050.3	1353	451	9.01	51488.5	0	C
OsCIPK11	LOC_Os01g60910.1	1506	502	8.48	56558.9	0	C
OsCIPK12	LOC_Os01g55450.1	1620	540	8.3	59807.7	1	E
OsCIPK13	LOC_Os01g10870.1	1533	511	8.05	56010.9	0	E
OsCIPK14	LOC_Os12g02200.2	1317	439	9.44	50324.3	0	C
OsCIPK15	LOC_Os11g02240.1	1302	434	9.53	49697.7	0	C
OsCIPK16	LOC_Os09g25090.1	1368	456	8.84	50504.1	0	C
OsCIPK17	LOC_Os05g04550.1	1362	454	6.93	50915	11	A
OsCIPK18	LOC_Os05g26820.1	1371	457	8.84	51497.4	0	C
OsCIPK19	LOC_Os05g43840.1	1524	508	7.26	56913	0	E
OsCIPK20	LOC_Os05g11790.1	1398	466	8.29	51350.7	0	C
OsCIPK21	LOC_Os07g44290.1	1575	525	9.26	59116.1	12	A
OsCIPK22	LOC_Os05g26940.1	1353	451	8.03	49323.4	0	D
OsCIPK23	LOC_Os07g05620.1	1350	450	9.23	50708.2	13	A
OsCIPK24	LOC_Os06g40370.1	1359	453	8.52	50935.7	13	A
OsCIPK25	LOC_Os06g35160.1	1542	514	8.78	56980.4	0	E
OsCIPK26	LOC_Os02g06570.2	1479	493	9.13	55907.9	0	C
OsCIPK27	LOC_Os09g25100.1	1212	404	8.4	43786.4	0	C
OsCIPK28	LOC_Os05g39870.1	1941	647	9.3	72662.3	6	C
OsCIPK29	LOC_Os07g48090.1	1329	443	8.69	48212.6	0	D
OsCIPK30	LOC_Os01g55440.1	1428	476	9.34	53563.5	0	E
OsCIPK31	LOC_Os07g48760.1	1335	445	6.9	50952.4	13	A
OsCIPK32	LOC_Os12g03810.2	1314	438	7.64	50337.8	13	A
OsCIPK33	LOC_Os11g03970.2	1362	454	7.14	52055.9	13	A
OsCIPK34	LOC_Os02g08140.1	1308	436	6.48	48849	13	A
OsCBL1	LOC_Os10g41510	639	213	4.66	24496.8	7	Ⅲ
OsCBL2	LOC_Os12g40510	675	225	4.8	25864.5	7	Ⅱ
OsCBL3	LOC_Os03g42840	675	225	4.77	25803.5	7	Ⅱ
OsCBL4	LOC_Os05g45810	630	210	4.98	23916.1	7	Ⅳ
OsCBL5	LOC_Os01g41510	654	218	4.79	25088.5	7	Ⅳ
OsCBL6	LOC_Os12g06510	882	294	5.04	33479.4	7	Ⅱ
OsCBL7	LOC_Os02g18880	639	213	4.78	24399.8	7	Ⅳ
OsCBL8	LOC_Os02g18930	639	213	4.92	24491	7	Ⅳ
OsCBL9	LOC_Os01g39770	870	290	4.84	32892.5	8	Ⅰ
OsCBL10	LOC_Os01g51420	798	266	4.87	29915.1	8	Ⅰ
